# Supplementary material for: Synthesis of novel 5-arylidenethiazolidinones with apoptotic properties via a three component reaction using piperidine as a bifunctional reagent
Source: Royal Society of Chemistry journal article supplement (doi:10.1039/c6ob01257d), 2016-01-01

**Synthesis of novel 5-arylidene-thiazolidinones with apoptotic properties via a three component reaction using piperidine as a bifunctional reagent**

Chandramohan Bathula,<sup>1</sup> Sayantan Tripathi,<sup>2</sup> Ramprasad Srinivasan,<sup>3</sup> Kunal Kumar Jha,<sup>1</sup> Arnab Ganguly,<sup>4</sup> G. Chakraborty,<sup>4</sup> Shailja Singh,<sup>2</sup> Parthapratim Munshi,<sup>1</sup> Subhabrata Sen\*<sup>1</sup>

<sup>1</sup> Department of Chemistry, School of Natural Sciences, Shiv Nadar University, Chithera, Dadri, Gautam Budh Nagar, Uttar Pradesh 201308, India

<sup>2</sup> Department of Life Science, School of Natural Sciences, Shiv Nadar University, Chithera, Dadri, Gautam Budh Nagar, Uttar Pradesh 201308, India

<sup>3</sup> Shantani, 100 NCL Innovation Park, Dr. Homi Bhabha Road, Pune - 411 008, India

<sup>4</sup> Department of Biotechnology And Dr. B. C. Guha Centre for Genetic, Engineering And Biotechnology, University of Calcutta  
35 Ballygunge Circular Road, Kolkata, WB 700 019, India.

## Contents

1. Melting points of compound **17a-o**
2. HPLC purity of compounds **17a-o**
3. HPLC spectra of compounds **17a-o**

1. Melting Points of compound **17a-o**

| <b>Compounds</b> | <b>Melting Points</b> |
|------------------|-----------------------|
| <b>17a</b>       | 152-154 °C            |
| <b>17b</b>       | 245-247 °C            |
| <b>17c</b>       | 198-200 °C            |
| <b>17d</b>       | 139-141 °C            |
| <b>17e</b>       | 240-242 °C            |
| <b>17f</b>       | 210-212 °C            |
| <b>17g</b>       | 228-230 °C            |
| <b>17h</b>       | 195-197 °C            |
| <b>17i</b>       | 155-157 °C            |
| <b>17j</b>       | 157-159 °C            |
| <b>17k</b>       | 137-139 °C            |
| <b>17l</b>       | 142-144 °C            |
| <b>17m</b>       | 165-167 °C            |
| <b>17n</b>       | 184-186 °C            |
| <b>17o</b>       | 210-212 °C            |

2. HPLC purity of compounds **17a-o**

HPLC of samples **17a-o**, were executed in Waters e2695 (Separating module), equipped with 2998 PDA detector and prepared at a concentration level of 500 ppm and 10 µl is injected for the purity analysis. ACN and 0.1% Formic Acid-H<sub>2</sub>O is used as mobile phase in ECLIPSE PLUS C18 (4.6 X 50 mm) 3.5 µM column.

| <b>Compounds</b> | <b>HPLC<br/>purity (%)</b> |
|------------------|----------------------------|
| <b>17a</b>       | ~100                       |
| <b>17b</b>       | ~100                       |
| <b>17c</b>       | 96.6                       |
| <b>17d</b>       | ~100                       |
| <b>17e</b>       | ~100                       |
| <b>17f</b>       | ~100                       |
| <b>17g</b>       | 98.9                       |
| <b>17h</b>       | ~100                       |
| <b>17i</b>       | ~100                       |
| <b>17j</b>       | 98.2                       |
| <b>17k</b>       | ~100                       |
| <b>17l</b>       | ~100                       |
| <b>17m</b>       | 99.5                       |
| <b>17n</b>       | 99.5                       |
| <b>17o</b>       | ~100                       |

Solvent gradient

| Time in Minutes | Flow ml/min | % of solvent 0.1 %<br>HCOOH in water | % of solvent<br>Acetonitrile (ACN) |
|-----------------|-------------|--------------------------------------|------------------------------------|
| 1               | 0.50        | 50                                   | 50                                 |
| 2      3        | 0.50        | 20                                   | 80                                 |
| 3      6        | 0.50        | 20                                   | 80                                 |
| 4      8        | 0.50        | 50                                   | 50                                 |



# Compound 17b

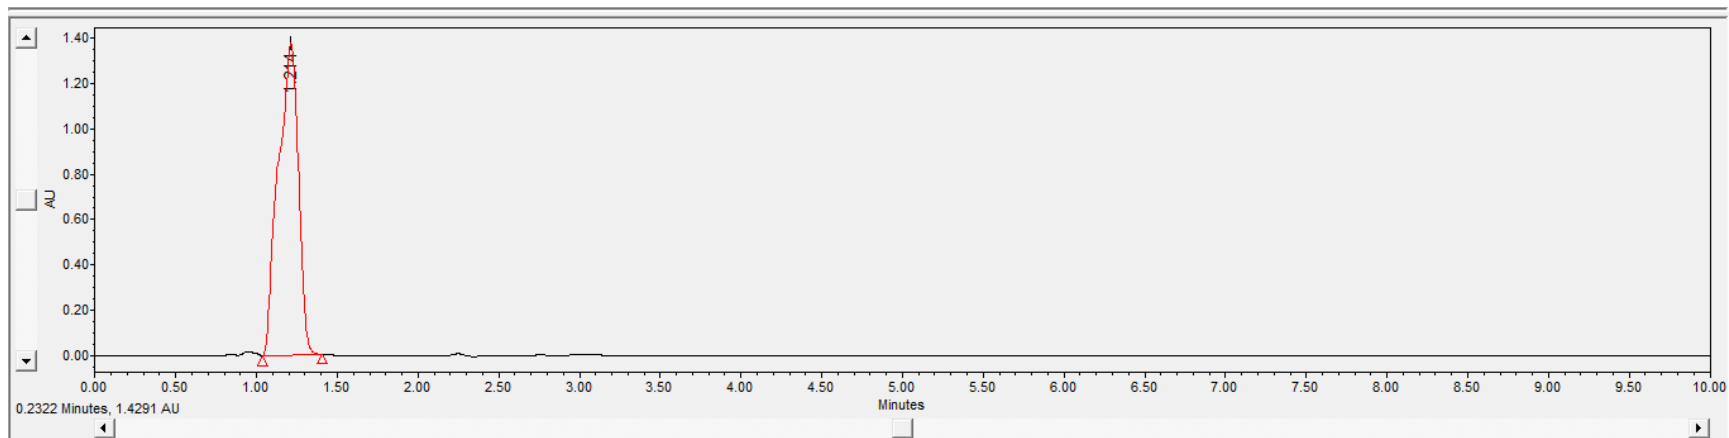

| Name | Retention Time (min) | Area ( $\mu\text{V}\cdot\text{sec}$ ) | % Area | Height ( $\mu\text{V}$ ) | Int Type | Amount | Units | Peak Type | Peak Codes |
|------|----------------------|---------------------------------------|--------|--------------------------|----------|--------|-------|-----------|------------|
| 1    | 1.214                | 11954417                              | 100.00 | 1376867                  | bb       |        |       | Unknown   |            |
|      |                      |                                       |        |                          |          |        |       |           |            |
|      |                      |                                       |        |                          |          |        |       |           |            |
|      |                      |                                       |        |                          |          |        |       |           |            |
|      |                      |                                       |        |                          |          |        |       |           |            |
|      |                      |                                       |        |                          |          |        |       |           |            |

# Compound 17c

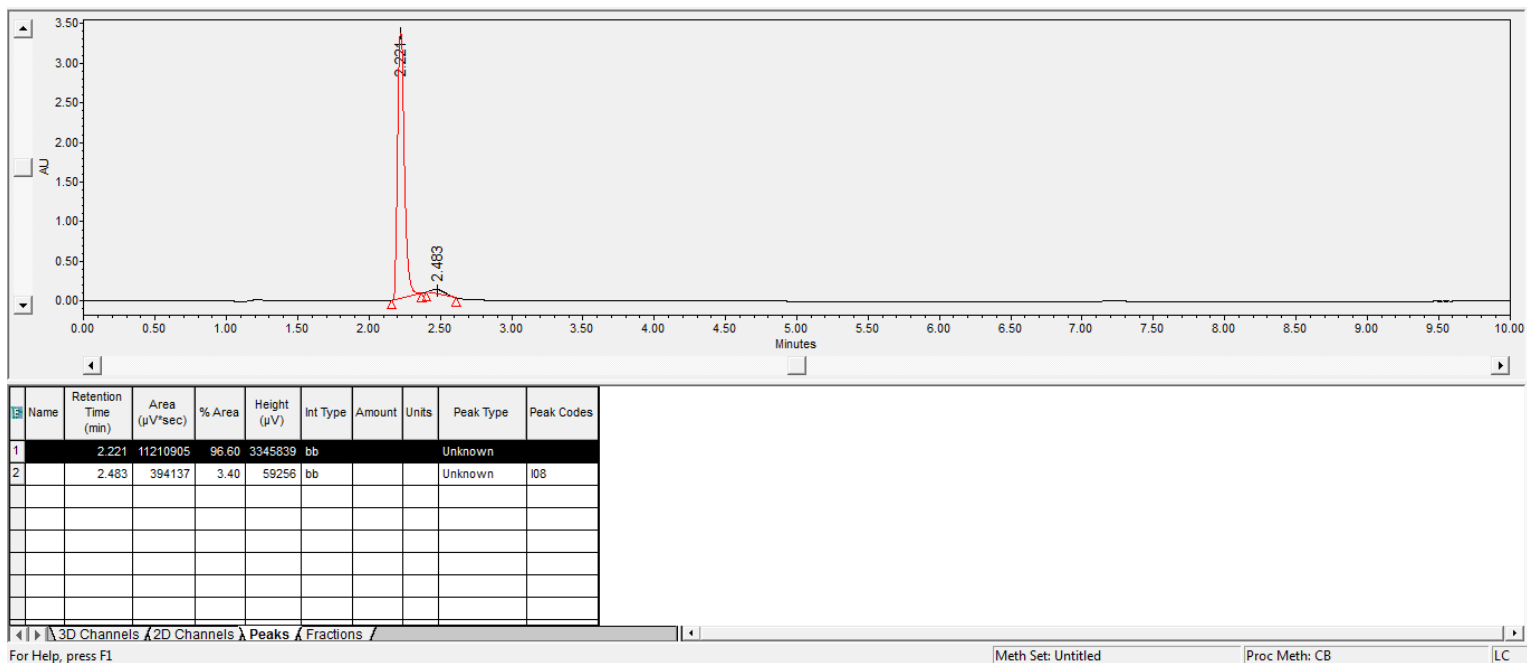

# Compound 17d

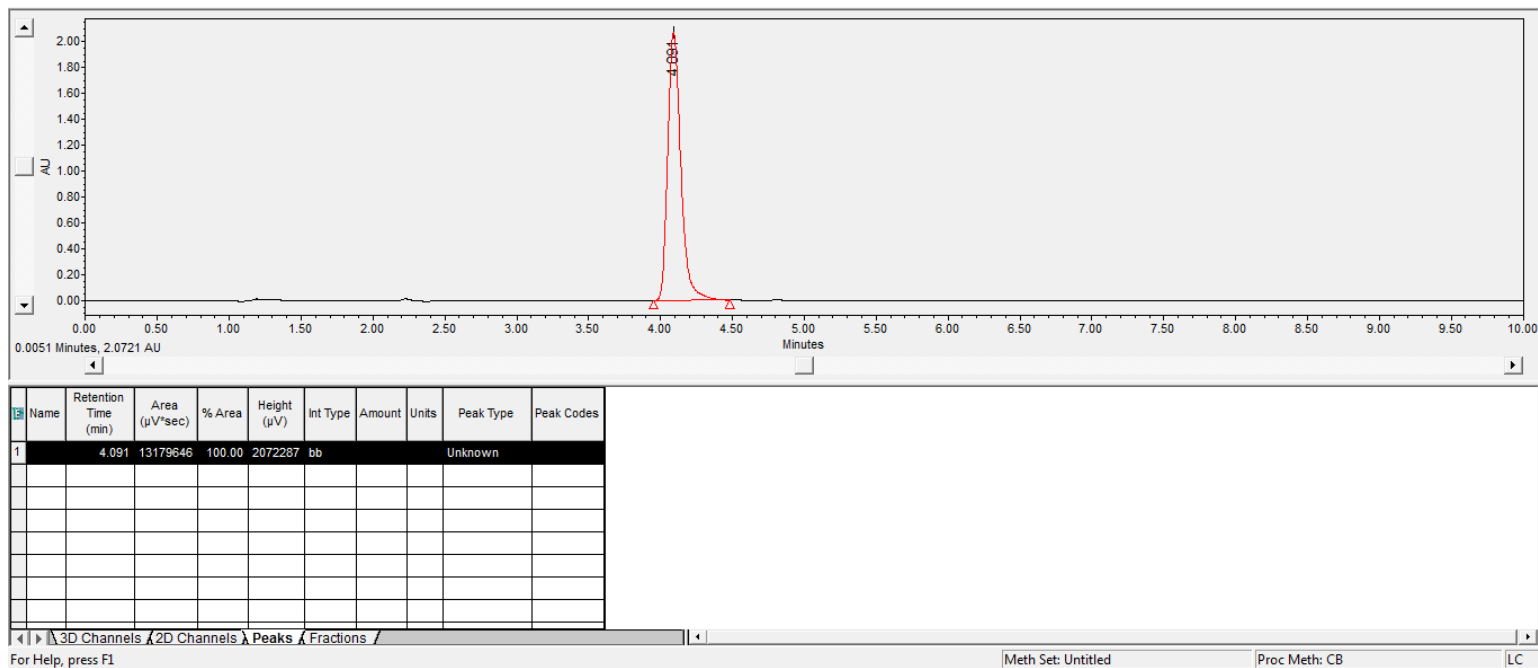



# Compound 17e

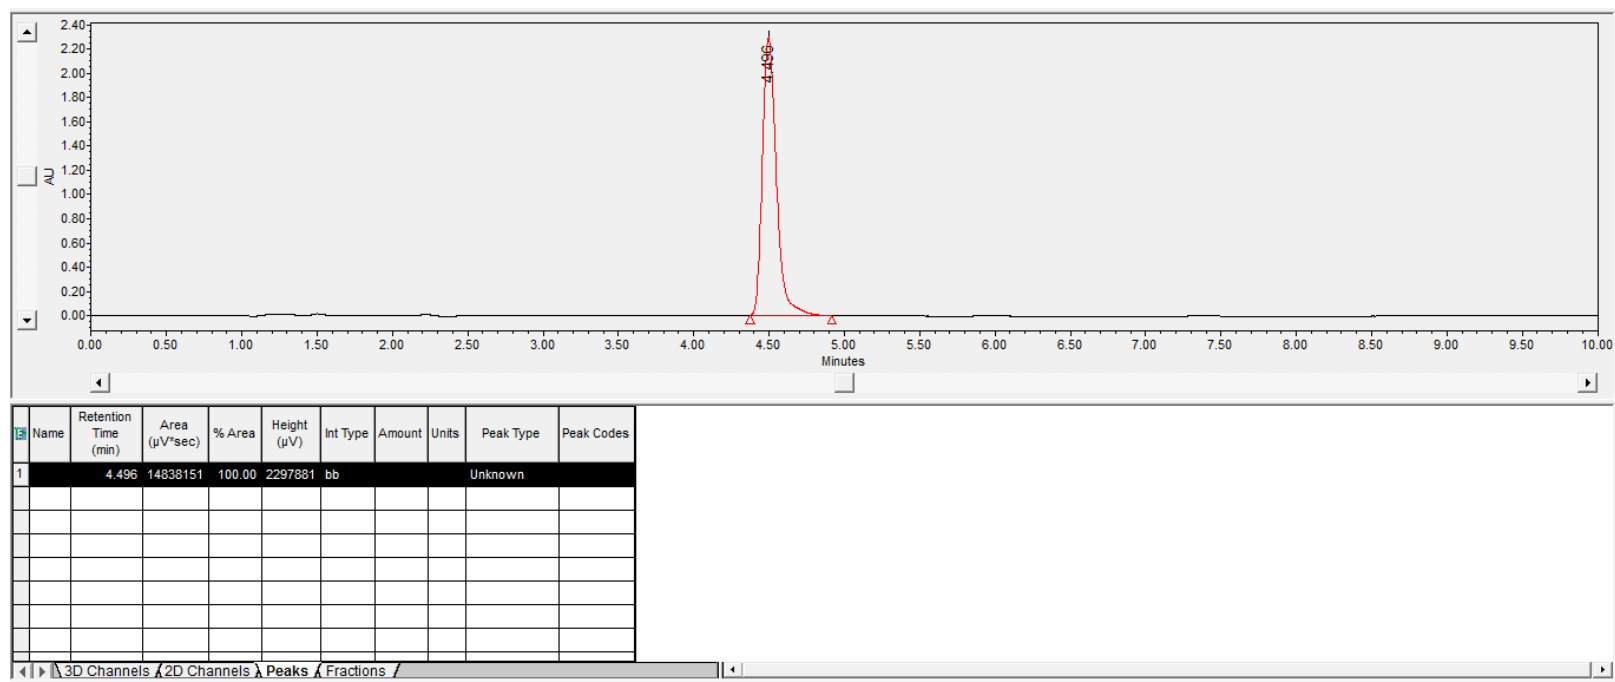

# Compound 17f

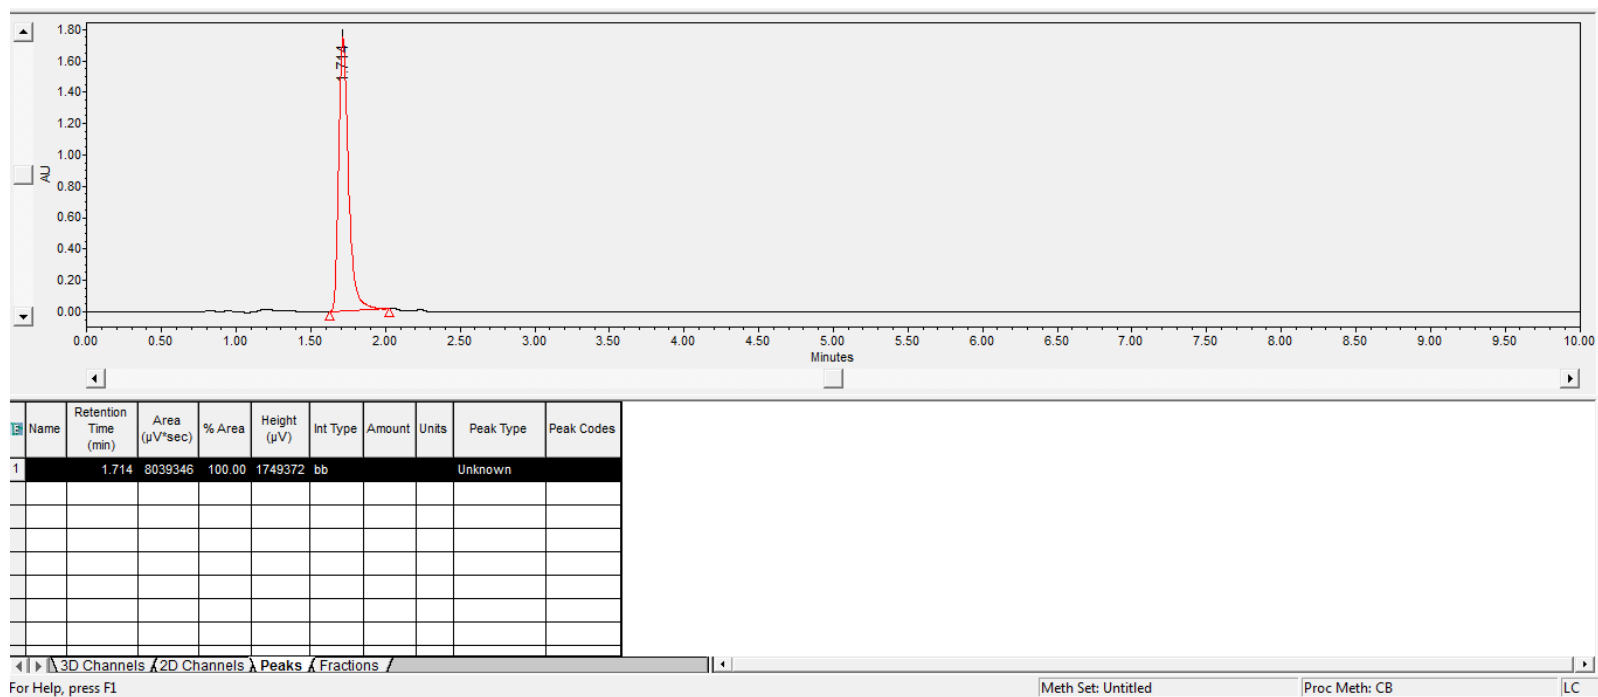

# Compound 17g

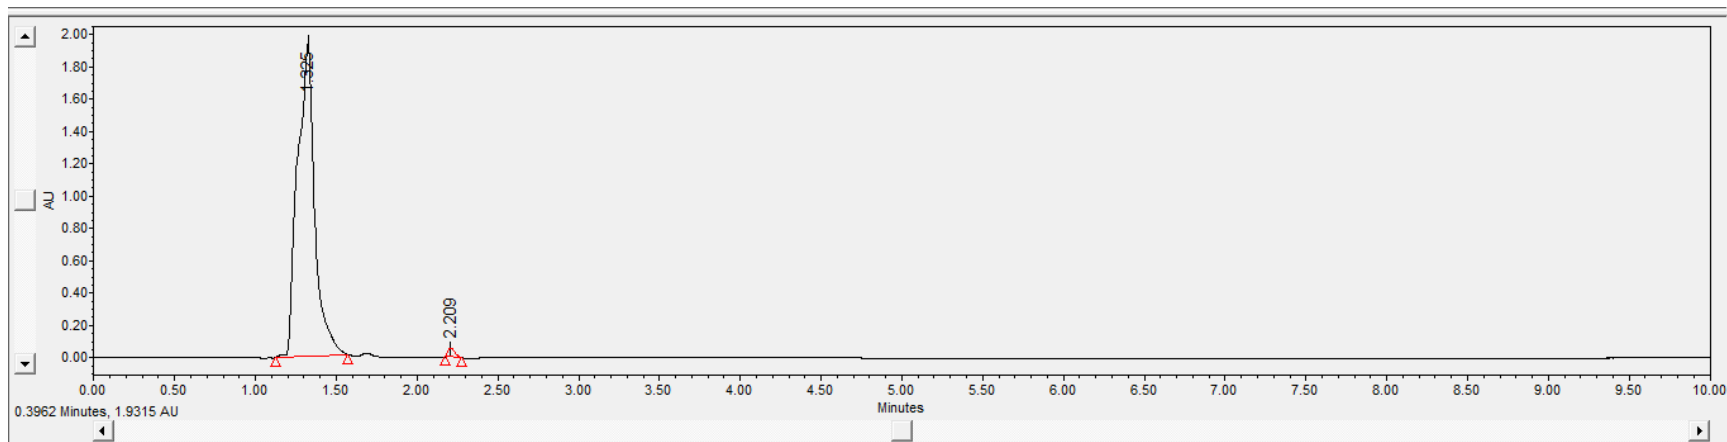

| Name | Retention Time (min) | Area (μV*sec) | % Area | Height (μV) | Int Type | Amount | Units | Peak Type | Peak Codes |
|------|----------------------|---------------|--------|-------------|----------|--------|-------|-----------|------------|
| 1    | 1.325                | 14374128      | 98.93  | 1940553     | bb       |        |       | Unknown   |            |
| 2    | 2.209                | 155494        | 1.07   | 54664       | bb       |        |       | Unknown   |            |
|      |                      |               |        |             |          |        |       |           |            |
|      |                      |               |        |             |          |        |       |           |            |
|      |                      |               |        |             |          |        |       |           |            |
|      |                      |               |        |             |          |        |       |           |            |

# Compound 17h

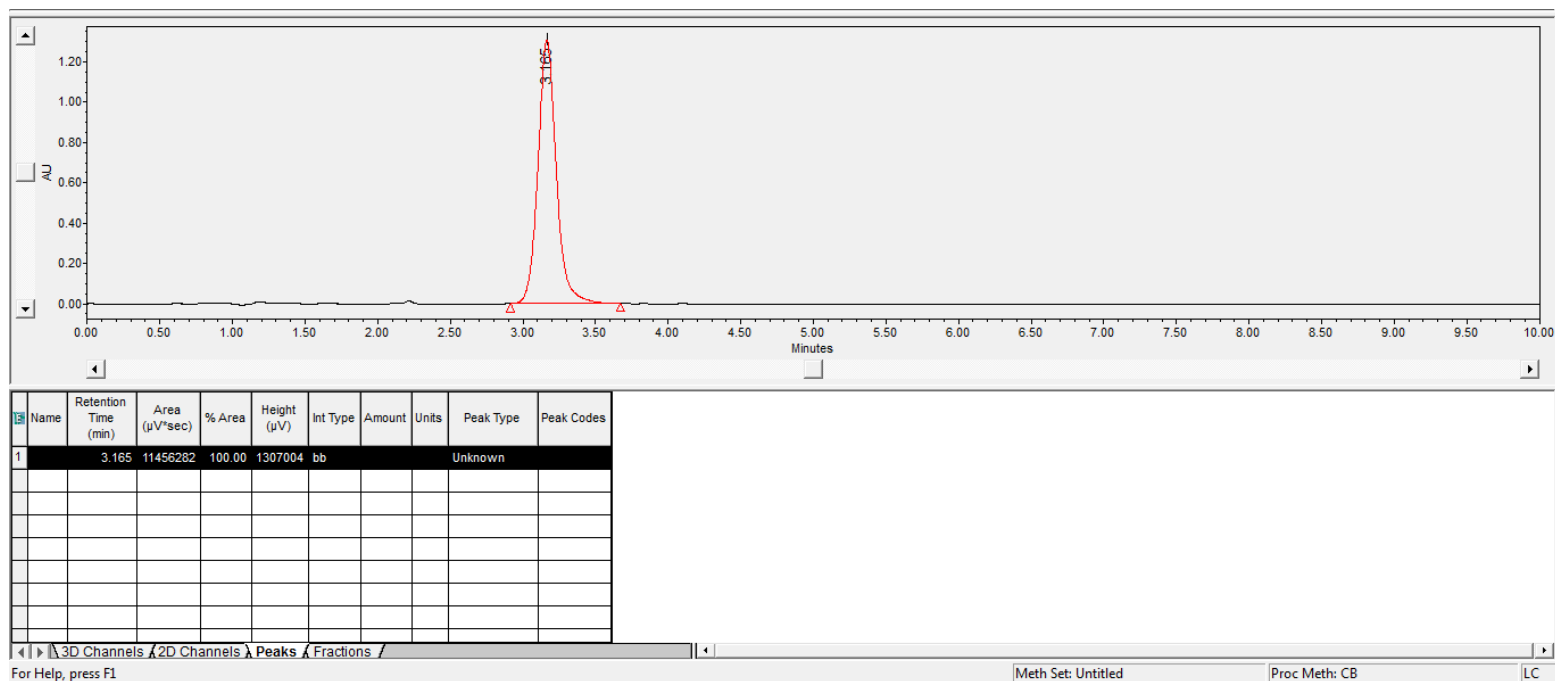

# Compound 17i

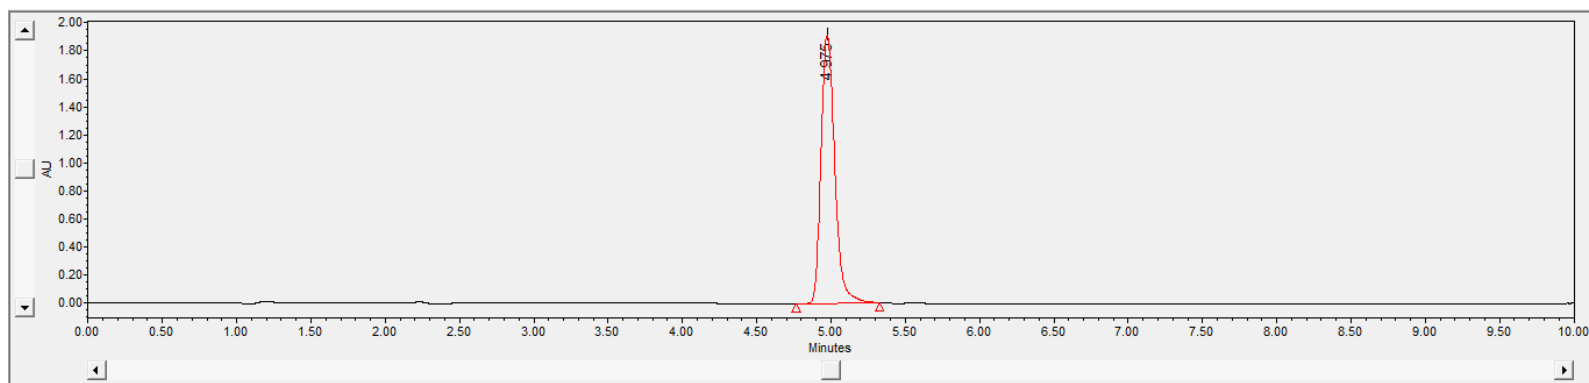

| Name | Retention Time (min) | Area (μV*sec) | % Area | Height (μV) | Int Type | Amount | Units | Peak Type | Peak Codes |
|------|----------------------|---------------|--------|-------------|----------|--------|-------|-----------|------------|
| 1    | 4.975                | 12240620      | 100.00 | 1914224     | bb       |        |       | Unknown   |            |
|      |                      |               |        |             |          |        |       |           |            |
|      |                      |               |        |             |          |        |       |           |            |
|      |                      |               |        |             |          |        |       |           |            |
|      |                      |               |        |             |          |        |       |           |            |
|      |                      |               |        |             |          |        |       |           |            |
|      |                      |               |        |             |          |        |       |           |            |
|      |                      |               |        |             |          |        |       |           |            |

# Compound 17j

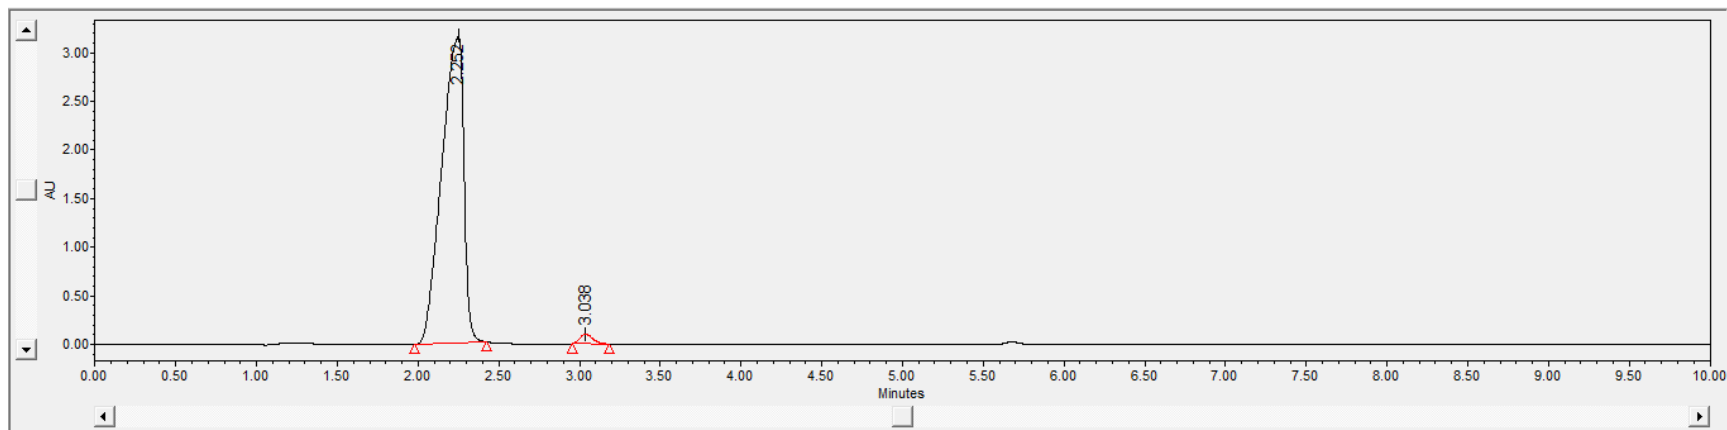

| Name | Retention Time (min) | Area (μV*sec) | % Area | Height (μV) | Int Type | Amount | Units | Peak Type | Peak Codes |
|------|----------------------|---------------|--------|-------------|----------|--------|-------|-----------|------------|
| 1    | 2.252                | 29984293      | 98.18  | 3156908     | bb       |        |       | Unknown   |            |
| 2    | 3.038                | 556599        | 1.82   | 100411      | bb       |        |       | Unknown   |            |
|      |                      |               |        |             |          |        |       |           |            |
|      |                      |               |        |             |          |        |       |           |            |
|      |                      |               |        |             |          |        |       |           |            |
|      |                      |               |        |             |          |        |       |           |            |
|      |                      |               |        |             |          |        |       |           |            |

# Compound 17k

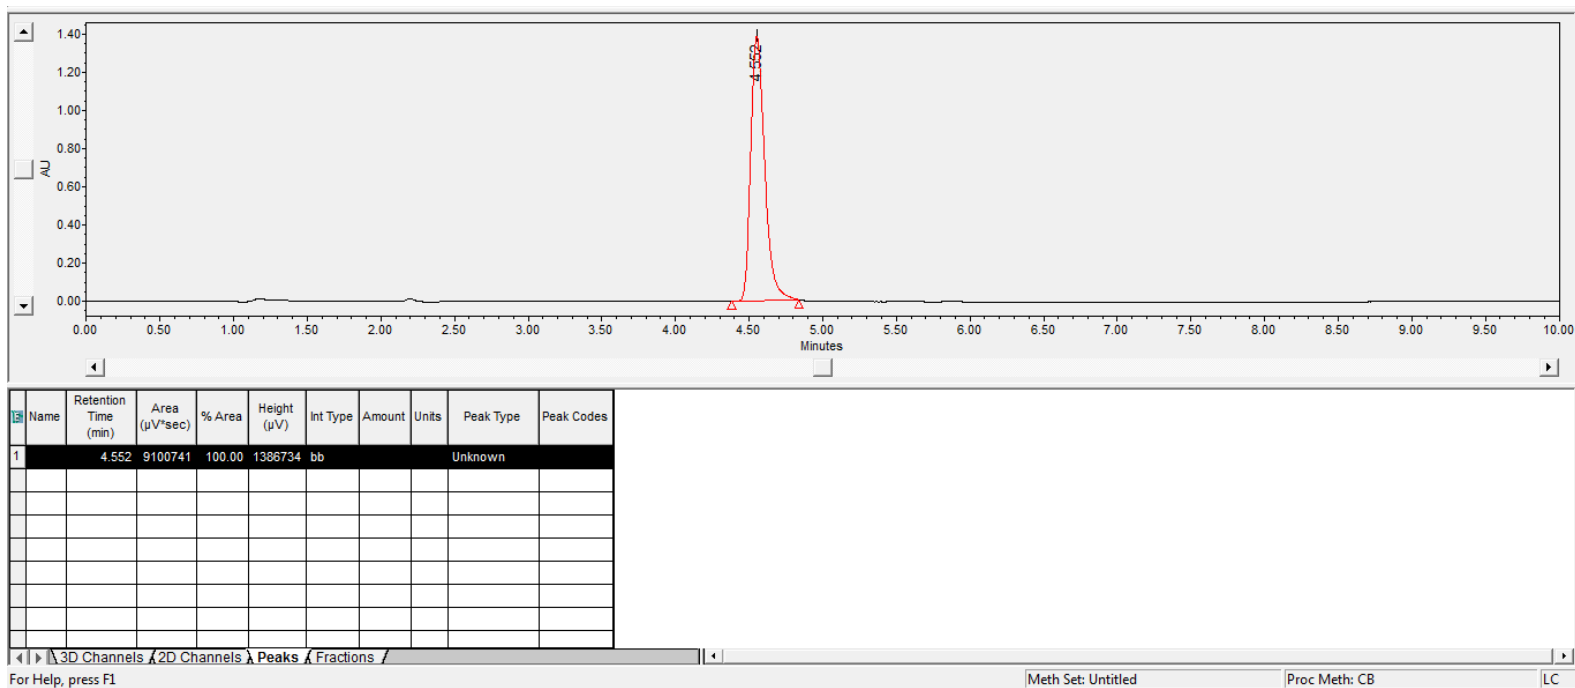

# Compound 171

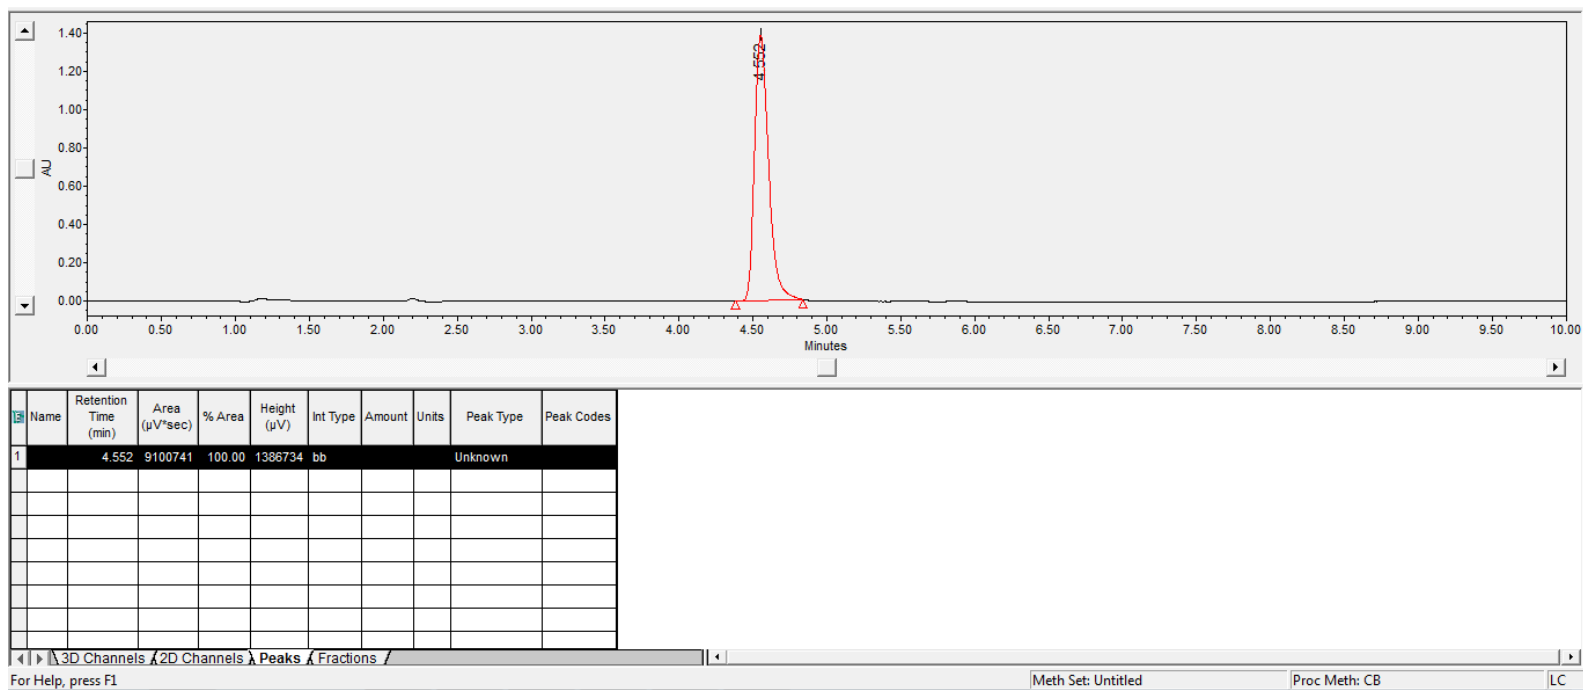



# Compound 17m

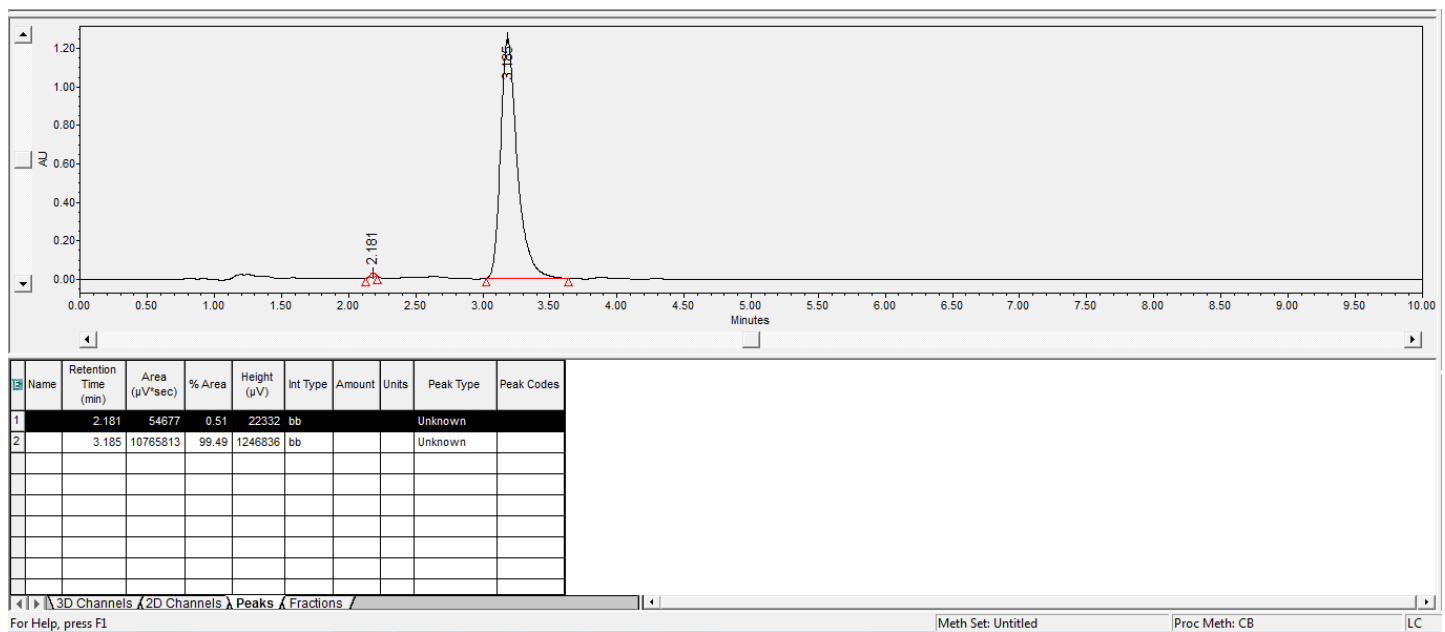

# Compound 17n

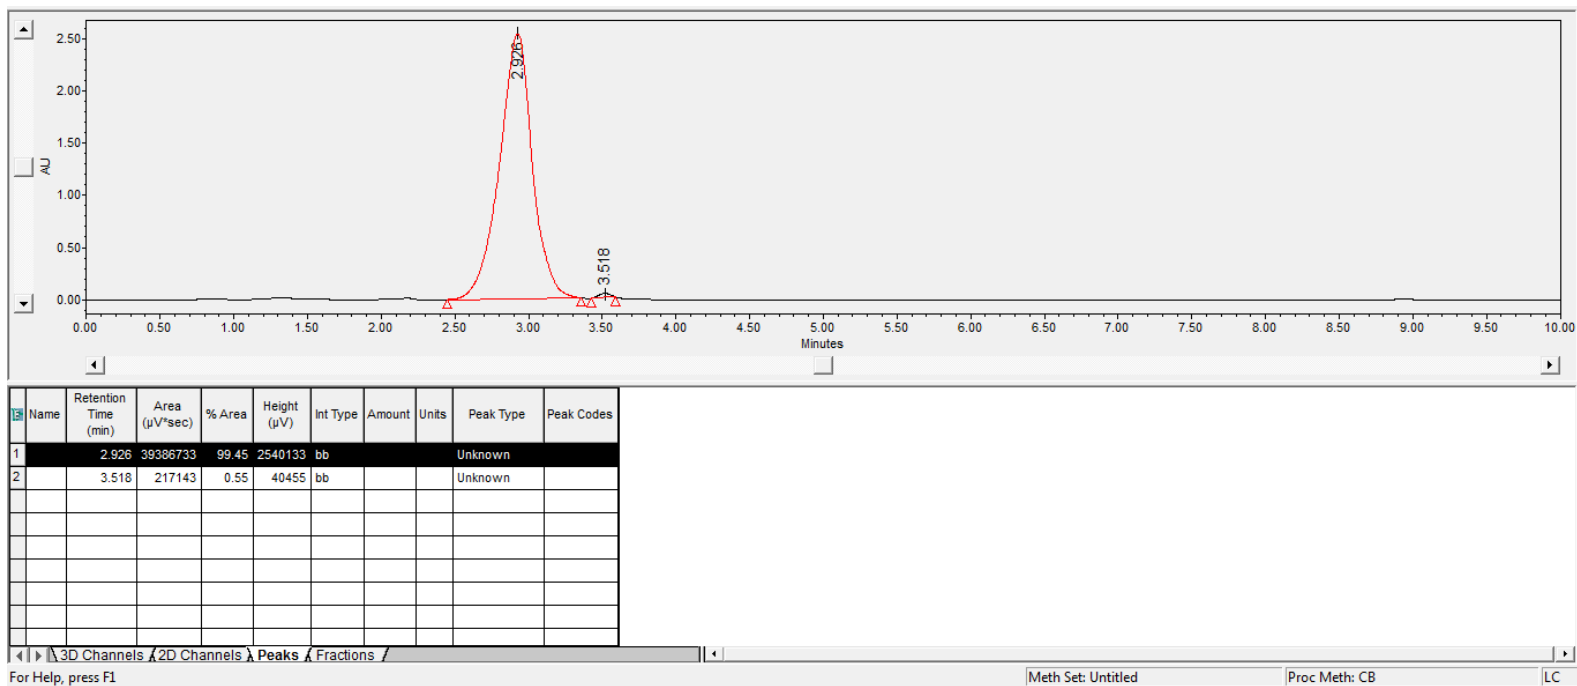

# Compound 17o

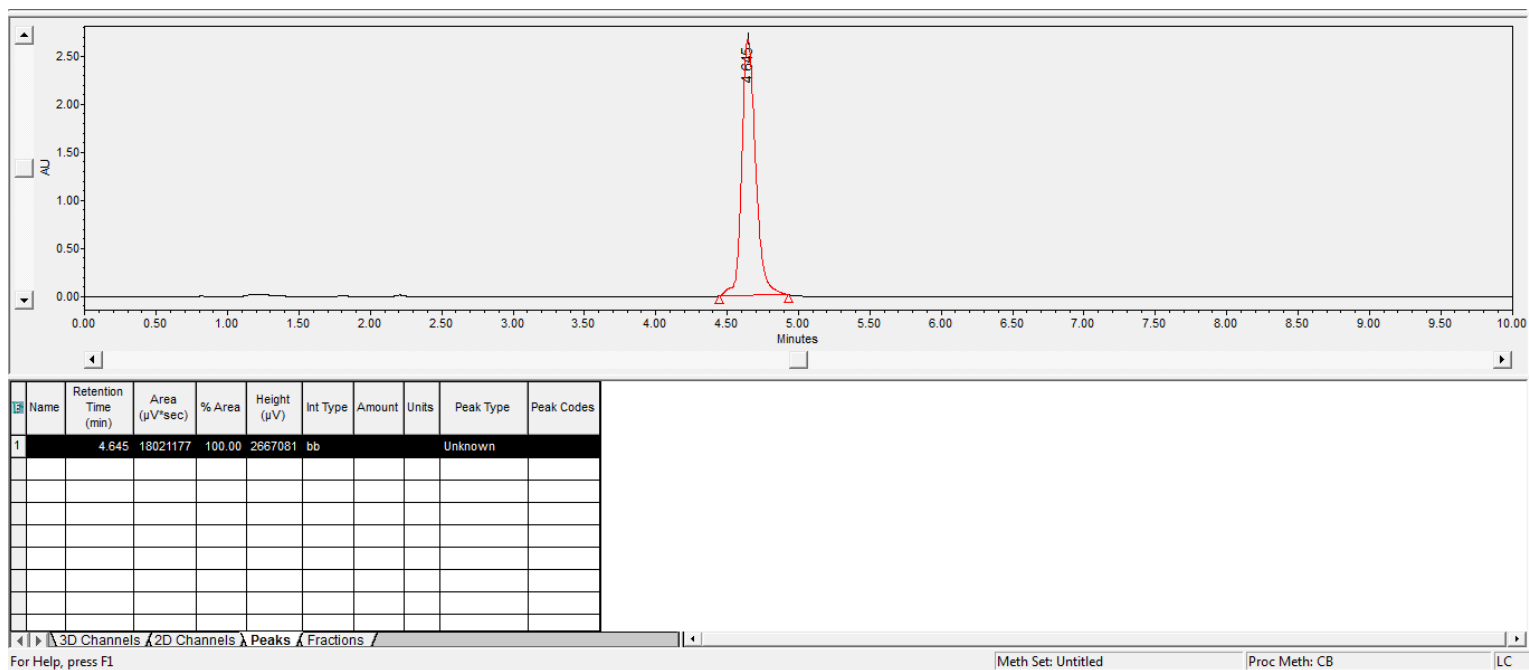

Supplement: c6ob01257d1.pdf [file c6ob01257d1.pdf]
